# Supplementary material for: Ammonium polyphosphate@melamine phytate-layered double hydroxides: a loaded core–shell flame retardant for flame retardancy and smoke suppression in polypropylene
Source: Royal Society of Chemistry journal article supplement (doi:10.1039/d4nj01711k), 2024-01-01
Supplement: d4nj01711k1.pdf [file d4nj01711k1.pdf]

## Electronic Supplementary Material

### Ammonium Polyphosphate @Melamine Phytate–Layered Double Hydroxides, a Loaded Core-Shell Flame Retardant for Flame Retardancy and Smoke Suppression in Polypropylene

Da Li<sup>a</sup>, Mingxin Feng<sup>a</sup>, Haoran Cai<sup>a</sup>, Yuhong Zhang<sup>a</sup>, Haoxu Yao<sup>b</sup>, Zewu Zhang<sup>a,b</sup>,  
Jiehua Bao<sup>a,b</sup>, Xiaohai Bu<sup>c</sup>, Yuming Zhou<sup>a,\*</sup>

<sup>a</sup> School of Chemistry and Chemical Engineering, Southeast University, Jiangsu  
Optoelectronic Functional Materials and Engineering Laboratory, Nanjing 211100,  
Jiangsu Province, China

<sup>b</sup> School of Materials Science and Engineering, Nanjing Institute of Technology,  
Nanjing, 211167, Jiangsu Province, China

<sup>c</sup> Jiangsu Xinde Polymer Materials Co., Ltd, Taizhou, 225300, Jiangsu Province, China

---

\* Corresponding author:

Tel./fax: +86 025 52090617.

E-mail: [ymzhou@seu.edu.cn](mailto:ymzhou@seu.edu.cn) (Y. Zhou)

## 2.3 Preparation of flame-retardant polypropylene

### The set temperatures of the twin-screw extruder and the injection molding machine

The temperature distribution in the twin-screw extruder was set to 160°C, 165°C, 170°C, 175°C, 180°C and 180°C for each zone, with a head temperature of 180°C and a melt temperature of 160°C. The temperature distribution of the injection molding machine was set to 180°C for zone one, 190°C for zone two, and 200°C for zone three.

Fig. S1. SEM of PMA and LDH

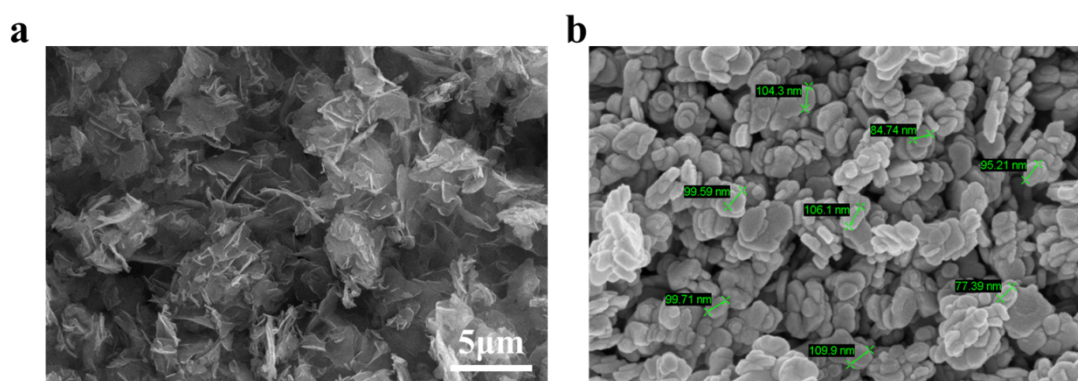

(a) SEM images of PMA, (b) SEM images of LDH

Fig. S2. N 1s XPS spectra of PMA

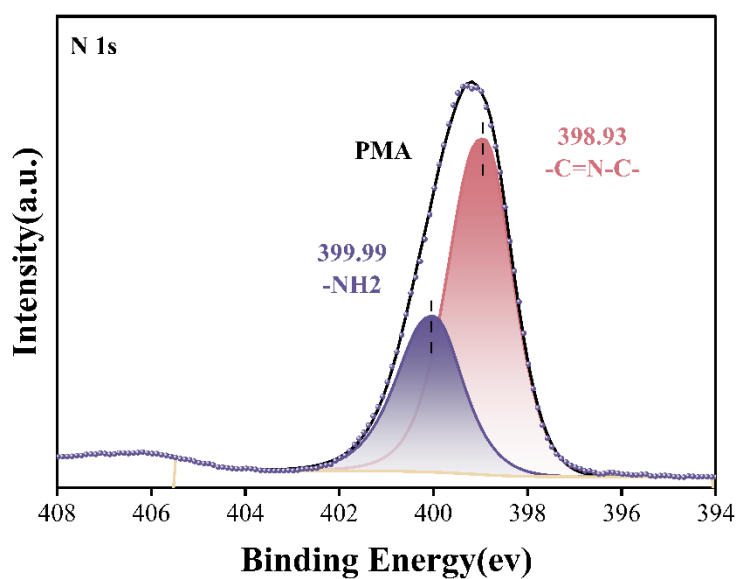

**Fig. S3. Mg 1s and Al 2p XPS spectra of char residue**

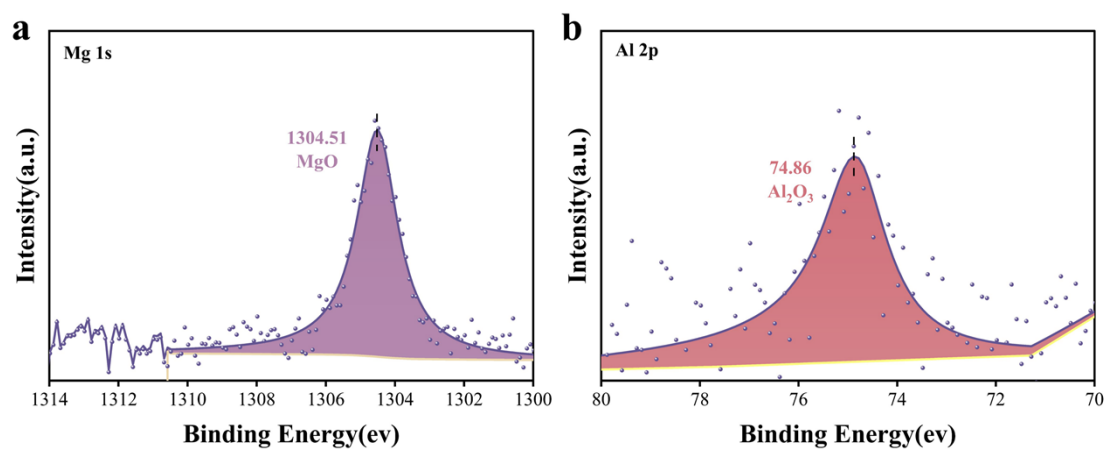

(a) Mg 1s XPS spectra of images of char residue, (b) Al 2p XPS spectra of images of char residue
